# Supplementary material for: Ecrg4 peptide is the ligand of multiple scavenger receptors
Source: PubMed Central journal article supplement (PMC5840397; doi:10.1038/s41598-018-22440-4), 2018-03-06

**Supplementary Information for**

## **Ecr4 peptide is the ligand of multiple scavenger receptors**

Tetsuo Moriguchi, Shuji Takeda, Shinzo Iwashita, Kei Enomoto, Tatsuya Sawamura, Uichi Koshimizu, and Toru Kondo

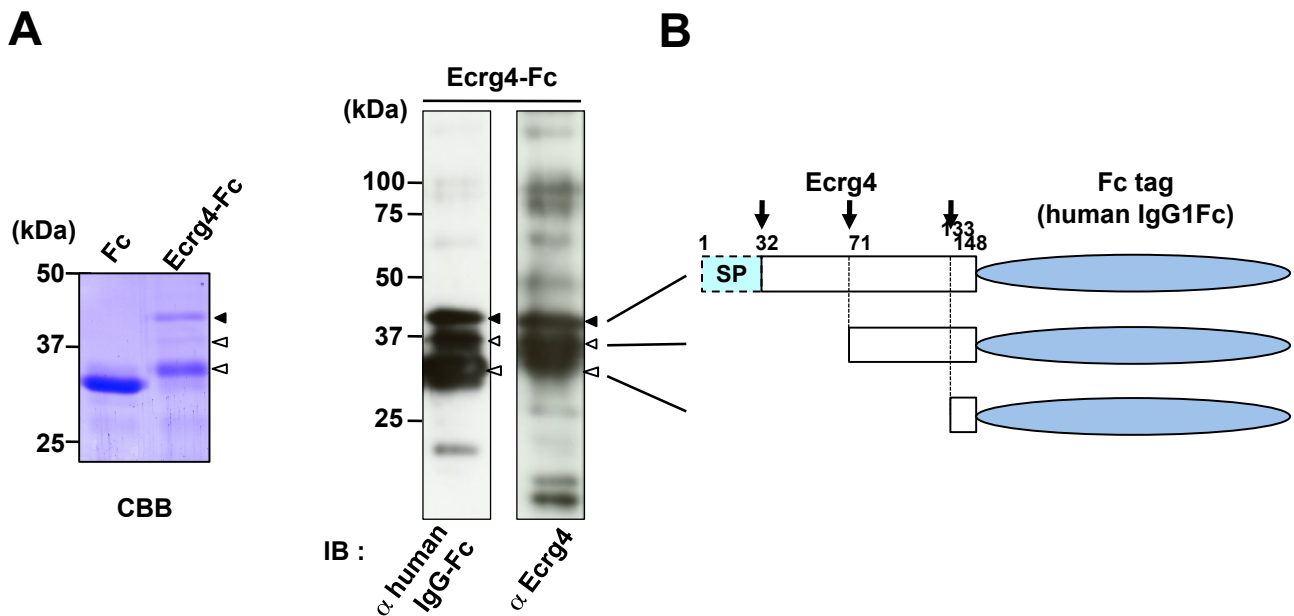

**Figure S1. Purified EcrG4–Fc proteins and their schematic representation.** (A) The Fc-fused proteins were purified from the culture supernatants of HEK293T cells transfected with plasmids encoding EcrG4 fused to human IgG1 Fc (EcrG4–Fc) or the control IgG1 Fc (Fc). The proteins were detected with Coomassie Brilliant Blue staining (CBB) or immunoblotted (IB) with anti-human IgG Fc antibody ( $\alpha$  human IgG-Fc) and anti-ECRG4 antibody ( $\alpha$  EcrG4). (B) Schematic representations of the EcrG4–Fc proteins. Putative cleavage sites are indicated by arrows. SP: signal peptide. The longest band (black arrowhead) is Fc-fused full-length EcrG4 after the signal peptide was removed, and the other bands (white arrowheads) are the forms of EcrG4 processed by furin or thrombin.

**A**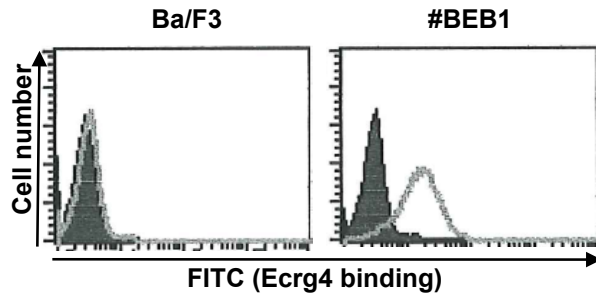**B**

| ProbeName     | GENE_SYMBOL   | GENE_NAME                                                    | Fold Change |
|---------------|---------------|--------------------------------------------------------------|-------------|
| A_52_P150950  | Olfm3         | olfactomedin 3                                               | 489.4609997 |
| A_52_P521507  | Trio          | triple functional domain (PTPRF interacting)                 | 85.34967769 |
| A_51_P248638  | Myoz2         | myozenin 2                                                   | 45.70626103 |
| A_51_P462192  | Olr1          | oxidized low density lipoprotein (lectin-like) receptor 1    | 32.64174999 |
| A_55_P1971425 | Serpib9f      | serine (or cysteine) peptidase inhibitor, clade B, member 9f | 32.53821266 |
| A_55_P2113673 | Eml1          | echinoderm microtubule associated protein like 1             | 32.02984919 |
| A_55_P2116714 |               |                                                              | 30.71346123 |
| A_52_P100341  | Zfp334        | zinc finger protein 334                                      | 30.40511203 |
| A_55_P2009077 | Sybu          | syntabulin (syntaxin-interacting)                            | 30.4047116  |
| A_55_P2174884 | Gm2016        | predicted gene 2016                                          | 29.60166664 |
| A_52_P299771  | Bcl2a1c       | B cell leukemia/lymphoma 2 related protein A1c               | 29.45157535 |
| A_55_P2159685 | Kcnj3         | potassium inwardly-rectifying channel, subfamily J, member 3 | 29.1293378  |
| A_51_P459320  | Gkap1         | G kinase anchoring protein 1                                 | 28.2026339  |
| A_55_P2042376 |               |                                                              | 28.03625216 |
| A_51_P116064  | 4921513103Rik | RIKEN cDNA 4921513103 gene                                   | 27.59967168 |
| A_55_P2033362 | Egr2          | early growth response 2                                      | 27.1892905  |
| A_51_P346132  | Rhox9         | reproductive homeobox 9                                      | 26.94489015 |
| A_55_P1971430 | Serpib9e      | serine (or cysteine) peptidase inhibitor, clade B, member 9e | 26.70526472 |
| A_55_P1971419 | Serpib9g      | serine (or cysteine) peptidase inhibitor, clade B, member 9g | 26.25218755 |
| A_51_P322972  | Hkdc1         | hexokinase domain containing 1                               | 25.74964319 |

**Figure S2. Characterisation of the variant Ba/F3 (#BEB1) cell line, which binds Ecrg4-Fc.** (A) Ba/F3 cells and Ba/F3 (#BEB1) cells were incubated with 20 µg/mL Ecrg4-Fc for 30 min on ice. The fluorescence intensities of the bound Ecrg4-Fc are shown. Open curve: staining profile of cells treated with 20 µg/mL Ecrg4-Fc. Closed curve: staining profile of Fc-treated cells. (B) List of the 20 top probe sets upregulated in the Ba/F3 (#BEB1) cells. LOX-1/Olr1 is included in the list.

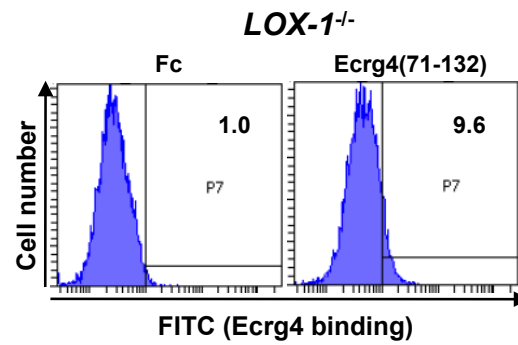

**Figure S3. Fluorescence intensities of Ecr4(71–132) bound to *LOX-1* deficient primary microglia.**

Primary microglia from *LOX-1*<sup>-/-</sup> mice were incubated with Fc(N293A)-fused Ecr4(71–132) for 1 h at 37°C. After microglia were washed, fixed, and permeabilised, Fc(N293A) proteins were detected with flow cytometry on a FACSCanto™ II cell sorter.

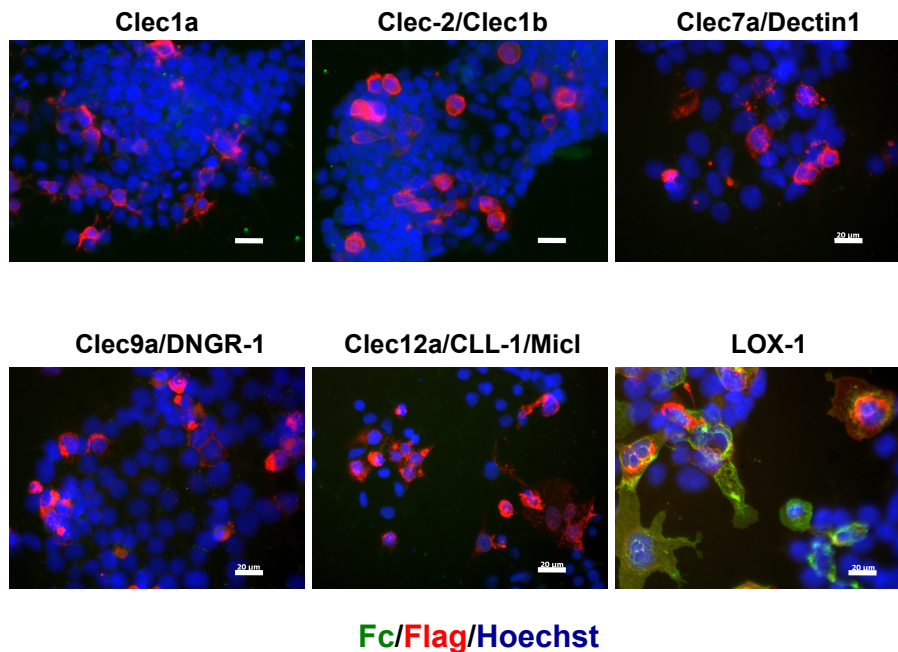

**Figure S4. Fluorescence microscopic analysis of HEK293T cells transiently transfected with plasmids encoding several C-type lectin-like receptors.** HEK293T cells were transiently transfected with plasmid encoding Flag-tagged mouse Clec1a, Clec2/Clec1b, Clec7a/Dectin1, Clec9a/DNGR-1, Clec12a, and LOX-1. Two days after transfection, the cells were incubated with Ecr4-Fc protein. The expression of each C-type lectin-like receptor was detected with an anti-Flag antibody (red), and Ecr4-Fc was measured with a FITC-labelled anti-human IgG Fc antibody (green).

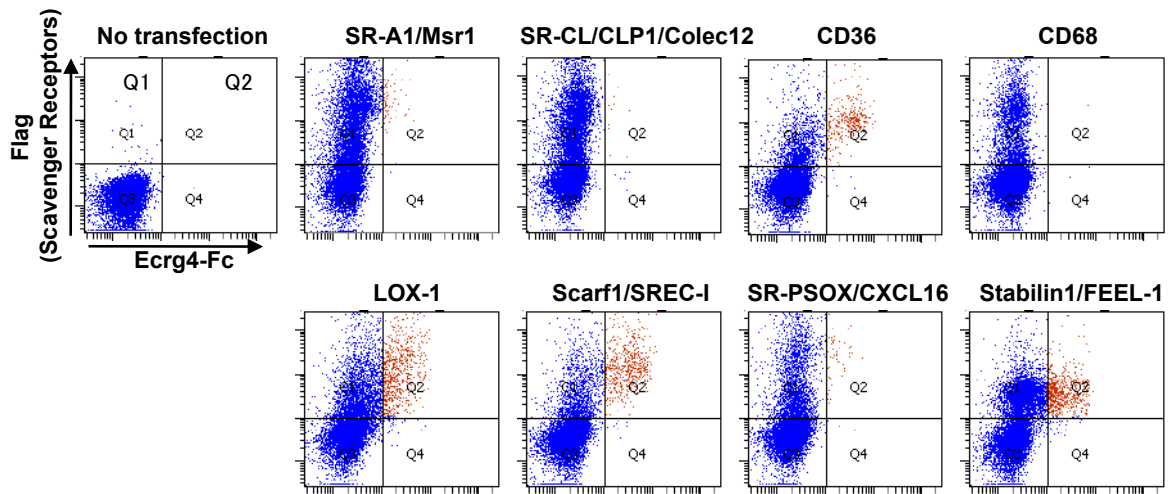

| <u>Tested receptors (class X)</u> | <u>Positive ratio</u> |
|-----------------------------------|-----------------------|
| SR-A (class A)                    | 1.7%                  |
| SR-CL/CLP1 (class A)              | 0.3%                  |
| CD36 (class B)                    | 20.7%                 |
| CD68 (class D)                    | less than 0.1%        |
| LOX-1 (class E)                   | 22.2%                 |
| Scarf1/SREC-I(class F)            | 29.5%                 |
| SR-PSOX/CXCL16 (class G)          | 2.6%                  |
| Stabilin1 (class H)               | 16.3%                 |

Positive ratio =  
 (EcrG4 positive cells (Q2)/Scavenger receptor positive cells (Q1+Q2))

**Figure S5. Internalisation of EcrG4(71–132) by several scavenger receptors.** HEK293T cells were transiently transfected with plasmids encoding the indicated Flag-tagged mouse scavenger receptors. Two days after transfection, the cells were incubated with EcrG4(71–132)–Fc protein, and the expression of the Flag-tagged receptors and the internalised Fc protein were detected with flow cytometry on a FACSCanto™ II cell sorter. Data are representative of three independent experiments. Lower panel: list of the calculated ratios of EcrG4(71–132) internalisation.

## Methods

### Animal and plasmids

C57BL/6-background *LOX-1*<sup>-/-</sup> mice were described previously <sup>1</sup>. Mouse *Clec1a* (NM\_175526), *Clec-2/Clec1b* (NM\_019985), *Clec7a/Dectin1* (NM\_001309637), *Clec9a/DNGR-1* (NM\_001205363), and *Clec12a/CLL-1/Micl* (NM\_177686) cDNAs were isolated from the spleens of C57BL/6 mice.

## Reference

1. Mehta, J.L. *et al.* Deletion of LOX-1 reduces atherogenesis in LDLR knockout mice fed high cholesterol diet. *Circ Res* **100**, 1634-1642 (2007).

Original blotting images for Fig. 3C.

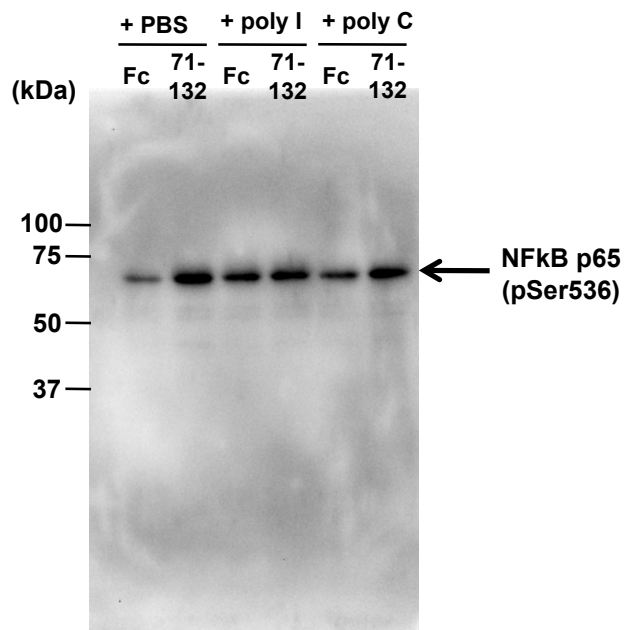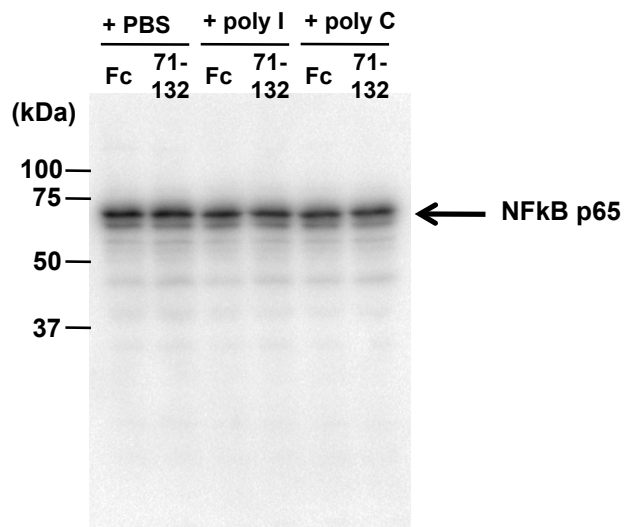



Original blotting images for Fig. 4B.

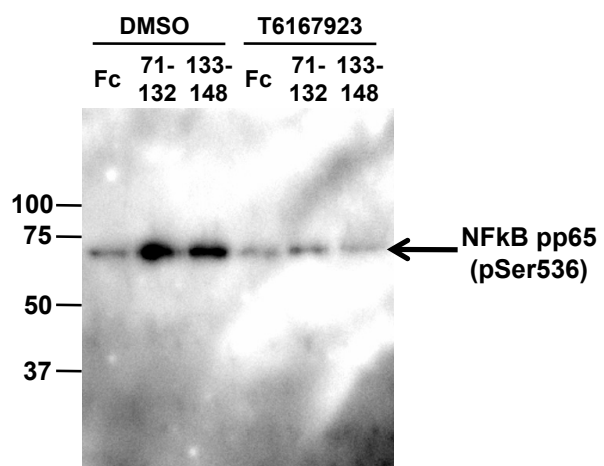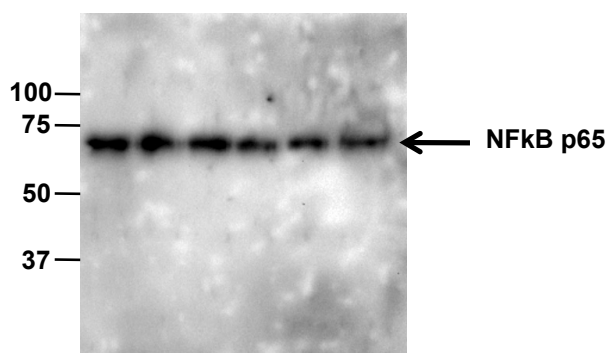

Supplement: 41598_2018_22440_MOESM1_ESM.pdf [file 41598_2018_22440_MOESM1_ESM.pdf]
